# Supplementary material for: Proliferation of preosteoblasts on TiO2nanotubes is FAK/RhoA related
Source: Royal Society of Chemistry journal article supplement (doi:10.1039/c4ra16803h), 2015-01-01
Supplement: c4ra16803h1.pdf [file c4ra16803h1.pdf]

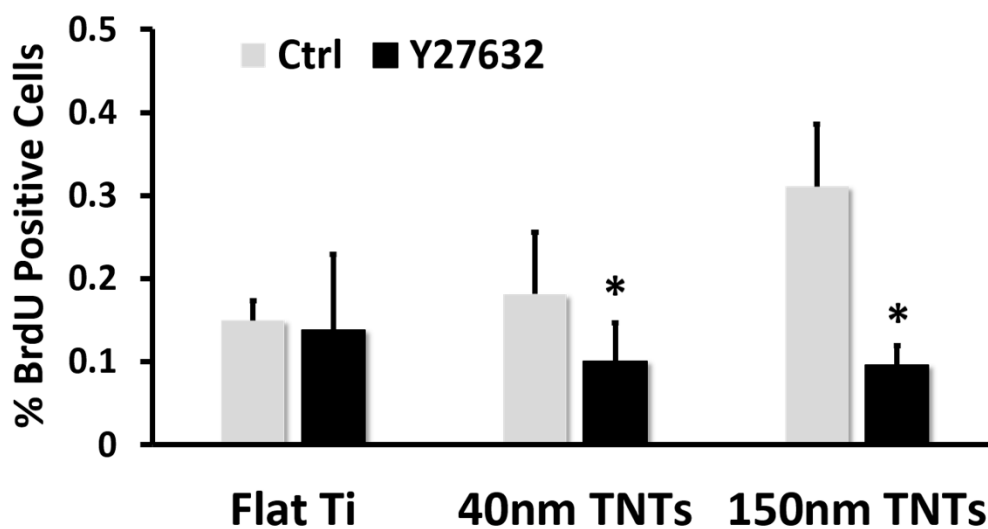

**Figure S1.** Quantification of BrdU-labeled nuclei for 24h culture. The statistical significance ( $p < 0.05$ ) after performing t-tests are marked: \*, indicates a significant difference between the cells growing on different substrates with same condition, compared with Flat Ti; #, denotes a significant difference between different treatment on the same substrate, compare with control group (regular medium without Y27632 treatment).
